# Supplementary material for: Mechanism-Driven and Clinically Focused Development of Botanical Foods as Multitarget Anticancer Medicine: Collective Perspectives and Insights from Preclinical Studies, IND Applications and Early-Phase Clinical Trials
Source: MDPI journal article supplement (doi:10.3390/cancers15030701), 2023-01-23
Supplement: s1 [file s1]

**Supplement Table S1.** List of anticancer foods with the bioactive molecules, mechanism of action and function endpoints.

| Food                   | Functional Molecules               | Targets and Mechanism of Action                                                                                                                                                                      | Level of Evidence                                      | Functional Endpoints                                                             | References     |
|------------------------|------------------------------------|------------------------------------------------------------------------------------------------------------------------------------------------------------------------------------------------------|--------------------------------------------------------|----------------------------------------------------------------------------------|----------------|
| <b>Edible Mushroom</b> | B-glucans                          | TLRs0Myd88-NFκB-TNFα/IL6/IL12                                                                                                                                                                        | Clinical, <i>in vitro</i> , and <i>in vivo</i> studies | Prime innate & adaptive immune cells                                             | [S1 – S5, S57] |
|                        |                                    | Dectin-Syk-NLRP3-IL1β*to                                                                                                                                                                             | Clinical, <i>in vitro</i> , and <i>in vivo</i> studies | Reduce immunosuppressive cells                                                   | [S6]           |
|                        |                                    | MDSCs, M2 Macrophage*to                                                                                                                                                                              |                                                        |                                                                                  |                |
|                        | Conjugated Linoleic acid           | Inhibitor aromatase, 5α-reductase and androgen receptor*‡                                                                                                                                            | <i>In vitro</i> and <i>in vivo</i> studies             | Inhibit E2/DHT formation<br>Inhibit AR/PSA production                            | [S4, S5]       |
|                        | Phytosterols (Tocopherols)         | Inhibit tyrosinase*                                                                                                                                                                                  | <i>In vitro</i> studies                                | Suppress cell growth                                                             | [S4, S5]       |
|                        | Ergosterol                         | Signaling molecules from Fox03: ± Fas, FasL, BimL & SimS*                                                                                                                                            | <i>In vitro</i> studies                                | Inhibit cell growth                                                              | [S2, S4, S7]   |
|                        | Flavonoids (myricetin, catechin)   | Potent immune stimulants<br>Protect against free radical damage*                                                                                                                                     | <i>In vitro</i> studies                                | Promote immune response, <b>disrupt redox homeostasis</b>                        | [S2, S4, S56]  |
| <b>Broccoli</b>        | Food Extract                       | Suppress prostaglandin E2, Ki67, DNA topoisomerase 2α*‡                                                                                                                                              | <i>In vitro</i> and <i>in vivo</i> studies             | Inhibit cell growth                                                              | [S8, S9]       |
|                        |                                    | ± Nfr2 transcriptional pathway*                                                                                                                                                                      | <i>In vitro</i> studies                                | <b>Eliminate redox reaction</b>                                                  | [S29, S30]     |
|                        | Flavonoid (Kaempferol)             | Inhibit NF-κB pathway*                                                                                                                                                                               | <i>In vitro</i> studies                                | <b>Decrease inflammation and redox activities</b>                                | [S29, S30]     |
|                        |                                    | Activates mitogen-activated protein kinase (MAPK) signaling pathway*                                                                                                                                 | <i>In vitro</i> studies                                | <b>Inhibit cell growth</b>                                                       | [S29, S30]     |
|                        |                                    | ↓ VEGF expression/ ∓HIF-1α*<br>G2/M phase cell cycle arrest*<br>∓ epithelial-mesenchymal transition (EMT)-related markers*<br>∓ PI3K/protein kinase B signaling pathways*<br>∓ ER signaling pathway* | <i>In vitro</i> studies                                | <b>Obstruct redox activities</b>                                                 | [S29, S30]     |
|                        |                                    | AITC-SiQDs, nanoscale system, disrupt ROS homeostasis*                                                                                                                                               | <i>In vitro</i> studies                                | <b>Obstruct redox activities</b>                                                 | [S29, S30]     |
|                        | Allyl isothiocyanate               | Activate Nrf2 to                                                                                                                                                                                     | Clinical trial and <i>in vivo</i> studies              | <b>Eliminate redox reaction</b>                                                  | [S31]          |
|                        | Sulforaphane                       | Target DNA methyltransferases (DNMTs), histone deacetyltransferases (HDACs) & noncoding RNAs*                                                                                                        | <i>In vitro</i> studies                                | <b>Epigenetics, cell cycle arrest</b>                                            | [S32]          |
|                        | Glutathione                        | ± antioxidant genes, such as Gclc, Gclm, heme oxygenase-1 (Hmox1), and NADPH quinone oxidoreductase-1 (Nqo1)*                                                                                        | <i>In vitro</i> studies                                | <b>Disrupt redox homeostasis resulting in higher immune activities</b>           | [S33, S34]     |
|                        | Allyl isothiocyanate nanoparticles | Inhibit TNF-α, IL-6, NO & iNOS production*                                                                                                                                                           | <i>In vitro</i> studies                                | <b>cell growth inhibition, anti-inflammation, and redox activity suppression</b> | [S35]          |
| <b>Garlic</b>          | Amino acids (Alliin, Allicin)      | G2/M arrest*<br>± Bax & FasL expressions ‡<br>± caspase-3, -8, & -9*                                                                                                                                 | <i>In vivo</i> and <i>in vitro</i> studies             | <b>Inhibit cell growth</b>                                                       | [S25, S26]     |
|                        | Diallyl trisulfide (DATS)          | ↓ G1, M, & S phases *‡<br>↑ Caspase-3 activity *‡<br>Sustain cyclin B1 expression *‡<br>Inhibit spindle formation *‡                                                                                 | <i>In vivo</i> and <i>in vitro</i> studies             | <b>Inhibit cell growth</b>                                                       | [S27]          |
|                        | Saponins                           | Inhibit intracellular ROS*<br>↓ γH2AX, prevent H2O2-induced DNA damage*<br>↑ antioxidant enzyme heme oxygenase-1 (HO-1)*<br>Activate Nrf2/HO-1 pathway*                                              | <i>In vitro</i> studies                                | <b>Eliminate redox activities</b>                                                | [S28]          |
|                        | Flavonoid (Kaempferol)             | ± Nfr2 transcriptional pathway*                                                                                                                                                                      | <i>In vitro</i> studies                                | <b>Eliminate redox reaction</b>                                                  | [S29, S30]     |
|                        |                                    | Inhibit NF-κB pathway*                                                                                                                                                                               | <i>In vitro</i> studies                                | <b>Decrease inflammation and redox activities</b>                                | [S29, S30]     |
|                        |                                    | Activates mitogen-activated protein kinase (MAPK) signaling pathway*<br>↓ VEGF expression/ ∓HIF-1α*                                                                                                  | <i>In vitro</i> studies                                | <b>Inhibit cell growth</b>                                                       | [S29, S30]     |

|             |                                                                                                     |                                                                                                                                                                                                                                                                                            |                                     |                                                                      |                 |
|-------------|-----------------------------------------------------------------------------------------------------|--------------------------------------------------------------------------------------------------------------------------------------------------------------------------------------------------------------------------------------------------------------------------------------------|-------------------------------------|----------------------------------------------------------------------|-----------------|
|             |                                                                                                     | G2/M phase cell cycle arrest*<br>⇐ epithelial-mesenchymal transition (EMT)-related markers*<br>⇐ PI3K/protein kinase B signaling pathways*                                                                                                                                                 |                                     |                                                                      |                 |
| Berries     | Quercetin                                                                                           | ⇐ cyclin B1 & CDK1*<br>Inhibit topo II activity ‡<br>DNA damage via ROS generation*                                                                                                                                                                                                        | <i>In vivo and in vitro studies</i> | Inhibit cell growth                                                  | [S49]           |
|             |                                                                                                     |                                                                                                                                                                                                                                                                                            | <i>In vitro studies</i>             | Low amounts inhibit cell cycle progression but not induce cell death | [S49]           |
|             |                                                                                                     |                                                                                                                                                                                                                                                                                            |                                     |                                                                      |                 |
|             | Anthocyanin                                                                                         | Activate caspase 3-pathways*<br>↓ cell proliferation*<br>↓ PI3K/AKT & NFκB activation & phosphorylation *‡<br>↓ Ki-67 expression, ↑ caspase-3 expression/apoptosis ‡<br>↓ AKT & p65 NF-κB signaling proteins ‡<br>↑ anti-inflammatory cytokines in serum (MIG, IP-10, IL-12, IL-2, TNF-α)* | <i>In vivo and in vitro studies</i> | Inhibit cell growth                                                  | [S50 – S53]     |
|             | Food extract (Jamun, blueberry)                                                                     | Inhibit cell growth/proliferation, ↑ apoptosis *‡                                                                                                                                                                                                                                          | <i>In vivo and in vitro studies</i> | Inhibit cell growth                                                  | [S53, S55]      |
| Pomegranate | Anthocyanidins (Delphinidin, Cyanidin, Pelargonidin)                                                | DNA damage in cancer cells via ROS generation*<br>↓ VEGF*                                                                                                                                                                                                                                  | <i>In vitro studies</i>             | Oxidative stress and inflammation                                    | [S10]           |
|             |                                                                                                     |                                                                                                                                                                                                                                                                                            | <i>In vitro studies</i>             | Inhibit cell growth                                                  | [S11]           |
|             | Polyphenol (Ellagitannin, Ellagic Acid)                                                             | ↓ specificity protein (Sp) transcription factors & Sp-related genes *‡<br>↓ miR-27a*‡, ⇐ miRNA0155*                                                                                                                                                                                        | <i>In vivo and in vitro studies</i> | Inhibit cell growth                                                  | [S12]           |
|             |                                                                                                     |                                                                                                                                                                                                                                                                                            | <i>In vivo and in vitro studies</i> | Regulate gene expression                                             | [S12]           |
|             |                                                                                                     | ⇐ cyclin A, B1, ⊥ cyclin E*                                                                                                                                                                                                                                                                | <i>In vitro studies</i>             | Inhibit cell cycle                                                   | [S11]           |
|             |                                                                                                     | Inhibit AKT activity, NF-κB activation, and COX-2 expression*                                                                                                                                                                                                                              | <i>In vitro studies</i>             | Oxidative stress and inflammation                                    | [S13]           |
|             | Metabolite (Urolithin A & B)                                                                        | Reduces IL-6, IL-1β, NOS2*                                                                                                                                                                                                                                                                 | <i>In vitro studies</i>             | Disrupt redox homeostasis                                            | [S11, S14, S15] |
|             |                                                                                                     | Inhibit aromatase activity*                                                                                                                                                                                                                                                                | <i>In vitro studies</i>             | Inhibit E2 formation                                                 | [S11, S14, S15] |
| Tomato      | Flavonoid (kaempferol, quercetin, naringenin)                                                       | Induce autophagy*                                                                                                                                                                                                                                                                          | <i>In vitro studies</i>             | Inhibit cell growth                                                  | [S17, S36]      |
|             | Carotenoid (Lycopene, Phytoene, Phytofluene, α- and β-carotene, βcryptoxanthin, Lutein, Zeaxanthin) | Activate antioxidant enzymes (glutathione, glutathione peroxidase, & glutathione-S-transferase) ‡ (Epre/ARE) activation*<br>Inhibit ERK phosphorylation*<br>Androgen receptor inhibition*                                                                                                  | <i>In vivo and in vitro studies</i> | Disrupt redox homeostasis                                            | [S36 – S39]     |
|             |                                                                                                     |                                                                                                                                                                                                                                                                                            | <i>In vitro studies</i>             | Inhibit cell growth                                                  | [S36 – S39]     |
|             |                                                                                                     |                                                                                                                                                                                                                                                                                            | <i>In vitro studies</i>             | Inhibit AR activity                                                  | [S36 – S39]     |
| Walnut      | Polyphenol (Ellagitannin)                                                                           | ↓ cyclin B1 protein*                                                                                                                                                                                                                                                                       | <i>In vitro studies</i>             | Inhibit cell growth                                                  | [S40]           |
|             | Vitamins (Tocopherol, Niacin)                                                                       | ⊥ PPAR activity*                                                                                                                                                                                                                                                                           | <i>In vitro studies</i>             | Inhibit cell growth                                                  | [S41]           |
|             | Flavonoid (quercetin, catechin)                                                                     | Induce autophagy*                                                                                                                                                                                                                                                                          | <i>In vitro studies</i>             | Inhibit cell growth                                                  | [S17]           |
|             | Phytosterol (stigmasterol, campsterol, sitosterol)                                                  | Activate ER-mitochondrial axis to induce cell death*<br>⇐ TNF-α & VEGFR-2*                                                                                                                                                                                                                 | <i>In vitro studies</i>             | Inhibit cell growth                                                  | [S42, S43]      |
|             | Juglone                                                                                             | Enhance the level of Fox03a & Fox01 in cells*<br>Induce G2/M phase cell cycle arrest*<br>Activate JNK pathway & ROS-mediated p38 to initiate autophagy*                                                                                                                                    | <i>In vitro studies</i>             | Disrupt the DNA replication and cell cycle division                  | [S44]           |
|             |                                                                                                     |                                                                                                                                                                                                                                                                                            | <i>In vitro studies</i>             | Inhibit cell growth                                                  | [S44]           |
|             |                                                                                                     |                                                                                                                                                                                                                                                                                            |                                     |                                                                      |                 |
|             | Metabolites (Urolithins-A, -C, & IsoUro-A)                                                          | ⇐ mRNA & protein level in PSA & AR*                                                                                                                                                                                                                                                        | <i>In vitro studies</i>             | Reduce PSA & AR activities                                           | [S45]           |

|        |                |                                                                |                         |                                       |            |
|--------|----------------|----------------------------------------------------------------|-------------------------|---------------------------------------|------------|
|        |                | ↓ Bcl-2 protein levels*                                        | <i>In vitro</i> studies | Inhibit cell growth, induce apoptosis | [S45]      |
| Ginger | Paradol        | ↓ EGFR protein expression*<br>Inactivate PI3K/AKT signaling*   | <i>In vitro</i> studies | Inhibit cell growth                   | [S46, S47] |
|        | Zingiberene    | Damage microtubules*                                           | <i>In vitro</i> studies | Inhibit cell growth                   | [S46]      |
|        | 1-monolinolein | ⊣ NF-κB activation*<br>↑ caspase-3/7 activation for apoptosis* | <i>In vitro</i> studies | Inhibit cell growth                   | [S45, S48] |

**Note:** ‡ in animal model; \* in cell line; o clinical trial; ↑ increase; ↓ decrease; ⊣ down-regulate; ⊕ up-regulate.

**Comment:** The biological activities being studied are mainly from *in vitro* models and that no references to animal models have shown to reduce the growth of xenografted tumors or PDX grafts, but the targets and mechanism of action are sometimes both observed and corresponded to each other in both *in vitro* and *in vivo* studies. Although clinical trials do not specify that the botanical foods are proven to have anti-cancer activities, some trials have shown that patients receiving botanical foods and/or botanical food agents along with chemotherapy have prolonged the cancer patient's survival (e.g., references S1 & S57). Many clinical trials could not conclude that botanical foods do reduce tumor growth, as they claim a larger sample size is needed for a higher level of evidence.

## References

- S1. Friedman M. Mushroom Polysaccharides: Chemistry and Antiobesity, Antidiabetes, Anticancer, and Antibiotic Properties in Cells, Rodents, and Humans. *Foods*. **2016**;5(4):80. doi:10.3390/foods5040080
- S2. You S. Mushrooms as Functional and Nutritious Food Ingredients for Multiple Applications. *ACS Food Science & Technology*. **2022** 2 (8), 1184-1195
- S3. "Shiitake Mushroom." *Memorial Sloan Kettering Cancer Center*, 8 June 2020, Available at: [www.mskcc.org/cancer-care/integrative-medicine/herbs/shiitake-mushroom](http://www.mskcc.org/cancer-care/integrative-medicine/herbs/shiitake-mushroom).
- S4. Valverde ME, Hernández-Pérez T, Paredes-López O. Edible mushrooms: improving human health and promoting quality life. *Int J Microbiol*. **2015** :376387. doi:10.1155/2015/376387
- S5. Vamanu E. Antioxidant properties of mushroom mycelia obtained by batch cultivation and tocopherol content affected by extraction procedures. *Biomed Res Int*. **2014**. 974804. doi:10.1155/2014/974804
- S6. Albeituni SH, Ding C, Liu M, et al. Yeast-Derived Particulate β-Glucan Treatment Subverts the Suppression of Myeloid-Derived Suppressor Cells (MDSC) by Inducing Polymorphonuclear MDSC Apoptosis and Monocytic MDSC Differentiation to APC in Cancer. *J Immunol*. **2016**;196(5):2167-2180. doi:10.4049/jimmunol.1501853
- S7. Li X, Wu Q, Xie Y, et al. Ergosterol purified from medicinal mushroom *Amauroderma rude* inhibits cancer growth in vitro and in vivo by up-regulating multiple tumor suppressors. *Oncotarget*. **2015**;6(19):17832-17846. doi:10.18632/oncotarget.4026
- S8. Lynn S. Adams, Shiuan Chen, Sheryl Phung, Xiwei Wu & Lui Ki. White Button Mushroom (*Agaricus Bisporus*) Exhibits Antiproliferative and Proapoptotic Properties and Inhibits Prostate Tumor Growth in Athymic Mice, *Nutrition and Cancer*, **2008**. 60:6, 744-756, DOI: 10.1080/01635580802192866
- S9. Wang X, Ha D, Mori H, Chen S. White button mushroom (*Agaricus bisporus*) disrupts androgen receptor signaling in human prostate cancer cells and patient-derived xenograft. *J Nutr Biochem*. **2021**;89:108580. doi:10.1016/j.jnutbio.2020.108580.
- S10. Farhan M, Rizvi A, Ali F, Ahmad A, Aatif M, Malik A, Alam MW, Muteeb G, Ahmad S, Noor A and Siddiqui FA. Pomegranate juice anthocyanidins induce cell death in human cancer cells by mobilizing intracellular copper ions and producing reactive oxygen species. *Front. Oncol*. **2022**.12:998346. doi: 10.3389/fonc.2022.998346.
- S11. Larrosa M, Tomás-Barberán FA, Espín JC. The dietary hydrolysable tannin punicalagin releases ellagic acid that induces apoptosis in human colon adenocarcinoma Caco-2 cells by using the mitochondrial pathway. *J Nutr Biochem*. **2006** Sep;17(9):611-25. doi: 10.1016/j.jnutbio.2005.09.004.
- S12. Banerjee N, Talcott S, Safe S, Mertens-Talcott SU. Cytotoxicity of pomegranate polyphenolics in breast cancer cells in vitro and vivo: potential role of miRNA-27a and miRNA-155 in cell survival and inflammation. *Breast Cancer Res Treat*. **2012**. 136(1):21-34. doi: 10.1007/s10549-012-2224-0.
- S13. Mukherjee, Sudeshna et al. "Pomegranate Polyphenols Attenuate Inflammation and Hepatic Damage in Tumor-Bearing Mice: Crucial Role of NF-κB and the Nrf2/GSH Axis." *The Journal of nutritional biochemistry* vol. **2021**. 97: 108812. doi:10.1016/j.jnutbio.2021.108812
- S14. Adams LS, Zhang Y, Seeram NP, Heber D, Chen S. Pomegranate ellagitannin-derived compounds exhibit antiproliferative and antiaromatase activity in breast cancer cells in vitro. *Cancer Prev Res (Phila)*. **2010**;3(1):108-113. doi: 10.1158/1940-6207.CAPR-08-0225
- S15. Nallanthighal S, Elmaliki KM, Reliene R. Pomegranate extract alters breast cancer stem cell properties in association with inhibition of epithelial-to-mesenchymal transition. *Nutr Cancer*. **2017**; 69:1088-98. doi: 10.1080/01635581.2017.1359318
- S16. Chikara S, Nagaprashantha LD, Singhal J, Horne D, Awasthi S, Singhal SS. Oxidative stress and dietary phytochemicals: Role in cancer chemoprevention and treatment. *Cancer Lett*. **2018**. 28; 413:122-134. doi: 10.1016/j.canlet.2017.11.002.
- S17. Wang P, Gao C, Wang W, et al. Juglone induces apoptosis and autophagy via modulation of mitogen-activated protein kinase pathways in human hepatocellular carcinoma cells. *Food Chem Toxicol*. **2018**;116(Pt B):40-50. doi:10.1016/j.fct.2018.04.004

- S18. Yun Wang, Kai Woo Lee, Franky L. Chan, Shiuan Chen, Lai K. Leung, The Red Wine Polyphenol Resveratrol Displays Bilevel Inhibition on Aromatase in Breast Cancer Cells, *Toxicological Sciences*, Volume 92, Issue 1, July 2006, Pages 71–77, <https://doi.org/10.1093/toxsci/kfj190>
- S19. Kaur M, Agarwal C, Agarwal R. Anticancer and cancer chemopreventive potential of grape seed extract and other grape-based products. *J Nutr.* **2009** Sep;139(9):1806S-12S. doi: 10.3945/jn.109.106864.
- S20. Lu J, Zhang K, Chen S, Wen W. Grape seed extract inhibits VEGF expression via reducing HIF-1 $\alpha$  protein expression. *Carcinogenesis.* **2009**;30(4):636-644. doi:10.1093/carcin/bgp009
- S21. Wen W, Lu J, Zhang K, Chen S. Grape seed extract inhibits angiogenesis via suppression of the vascular endothelial growth factor receptor signaling pathway. *Cancer Prev Res (Phila).* **2008**;1(7):554-561. doi:10.1158/1940-6207.CAPR-08-0040
- S22. Dutta A, Chakraborty A. Cinnamon in Anticancer Armamentarium: A Molecular Approach. *J Toxicol.* **2018.** 29;2018:8978731. doi: 10.1155/2018/8978731.
- S23. Sadeghi S, Davoodvandi A, Pourhanifeh MH, Sharifi N, ArefNezhad R, Sahebnaasagh R, Moghadam SA, Sahebkar A, Mirzaei H. Anti-cancer effects of cinnamon: Insights into its apoptosis effects. *Eur J Med Chem.* **2019.** 15;178:131-140. doi: 10.1016/j.ejmech.2019.05.067.
- S24. Gopalakrishnan S, Ismail A. Aromatic monophenols from cinnamon bark act as proteasome inhibitors by upregulating ER stress, suppressing FoxM1 expression, and inducing apoptosis in prostate cancer cells. *Phytother Res.* **2021.** 35(10):5781-5794. doi: 10.1002/ptr.7236.
- S25. Sarvizadeh M, Hasanpour O, Naderi Ghale-Noie Z, et al. Allicin and Digestive System Cancers: From Chemical Structure to Its Therapeutic Opportunities. *Front Oncol.* **2021;** 11:650256. doi:10.3389/fonc.2021.650256
- S26. Sarvizadeh M, Hasanpour O, Naderi Ghale-Noie Z, Mollazadeh S, Rezaei M, Pourghadamyari H, Masoud Khooy M, Aschner M, Khan H, Rezaei N, Shojaie L and Mirzaei H (2021) Allicin and Digestive System Cancers: From Chemical Structure to Its Therapeutic Opportunities. *Front. Oncol.* **2021**.11:650256. doi: 10.3389/fonc.2021.650256
- S27. Hosono T, Fukao T, Ogihara J, et al. Diallyl trisulfide suppresses the proliferation and induces apoptosis of human colon cancer cells through oxidative modification of beta-tubulin. *J Biol Chem.* **2005**;280(50):41487-41493. doi:10.1074/jbc.M507127200
- S28. Kang JS, Kim SO, Kim GY, et al. An exploration of the antioxidant effects of garlic saponins in mouse-derived C2C12 myoblasts. *Int J Mol Med.* **2016**;37(1):149-156. doi:10.3892/ijmm.2015.2398
- S29. Imran M, Salehi B, Sharifi-Rad J, Aslam Gondal T, Saeed F, Imran A, Shahbaz M, Tsouh Fokou PV, Umair Arshad M, Khan H, Guerreiro SG, Martins N, Estevinho LM. Kaempferol: A Key Emphasis to Its Anticancer Potential. *Molecules.* **2019**.19;24(12):2277. doi: 10.3390/molecules24122277.
- S30. Lee GA, Choi KC, Hwang KA. Kaempferol, a phytoestrogen, suppressed triclosan-induced epithelial-mesenchymal transition and metastatic-related behaviors of MCF-7 breast cancer cells. *Environ Toxicol Pharmacol.* **2017**;49:48-57. doi:10.1016/j.etap.2016.11.016
- S31. Liu, P., Behray, M., Wang, Q. *et al.* Anti-cancer activities of allyl isothiocyanate and its conjugated silicon quantum dots. *Sci Rep.* **2018.** 8, 1084. doi.org/10.1038/s41598-018-19353-7
- S32. Su X, Jiang X, Meng L, Dong X, Shen Y, Xin Y. Anticancer Activity of Sulforaphane: The Epigenetic Mechanisms and the Nrf2 Signaling Pathway. *Oxid Med Cell Longev.* **2018;** 5438179. doi:10.1155/2018/5438179
- S33. Peng X, Urso M, Balvan J, Masarik M, Pumera M. Self-propelled magnetic dendrite-shaped microrobots for photodynamic prostate cancer therapy. *Angew Chem Int Ed Engl.* **2022.** 30 doi: 10.1002/anie.202213505.
- S34. Melnikov F, Botta D, White CC, et al. Kinetics of Glutathione Depletion and Antioxidant Gene Expression as Indicators of Chemical Modes of Action Assessed in Vitro in Mouse Hepatocytes with Enhanced Glutathione Synthesis. *Chem Res Toxicol.* **2019**;32(3):421-436. doi:10.1021/acs.chemrestox.8b00259
- S35. Chang WJ, Chen BH, Inbaraj BS, Chien JT. Preparation of allyl isothiocyanate nanoparticles, their anti-inflammatory activity towards RAW 264.7 macrophage cells and anti-proliferative effect on HT1376 bladder cancer cells. *J Sci Food Agric.* **2019** Apr;99(6):3106-3116. doi: 10.1002/jsfa.9524.
- S36. Campbell JK, Canene-Adams K, Lindshield BL, Boileau TW, Clinton SK, Erdman JW Jr. Tomato phytochemicals and prostate cancer risk. *J Nutr.* **2004.** 134(12 Suppl):3486S-3492S. doi: 10.1093/jn/134.12.3486S.
- S37. Applegate CC, Lowerison MR, Hambley E, Song P, Wallig MA, Erdman JW Jr. Dietary tomato inhibits angiogenesis in TRAMP prostate cancer but is not protective with a Western-style diet in this pilot study. *Sci Rep.* **2021.** 17;11(1):18548. doi: 10.1038/s41598-021-97539-2.
- S38. Kim MJ, Kim H. Anticancer Effect of Lycopene in Gastric Carcinogenesis. *J Cancer Prev.* **2015**;20(2):92-96. doi:10.15430/JCP.2015.20.2.92
- S39. Linnewiel-Hermoni K, Khanin M, Danilenko M, et al. The anti-cancer effects of carotenoids and other phytonutrients resides in their combined activity. *Arch Biochem Biophys.* **2015**;572:28-35. doi:10.1016/j.abb.2015.02.018
- S40. Le V, Esposito D, Grace MH, et al. Cytotoxic effects of ellagitannins isolated from walnuts in human cancer cells. *Nutr Cancer.* **2014**;66(8):1304-1314. doi:10.1080/01635581.2014.956246
- S41. Hardman WE. Walnuts have potential for cancer prevention and treatment in mice. *J Nutr.* **2014**;144(4 Suppl):555S-560S. doi:10.3945/jn.113.188466

- S42. Catanzaro E, Greco G, Potenza L, Calcabrini C, Fimognari C. Natural Products to Fight Cancer: A Focus on *Juglans regia*. *Toxins (Basel)*. **2018**;14;10(11):469. doi: 10.3390/toxins10110469.
- S43. Bae H, Song G, Lim W. Stigmasterol Causes Ovarian Cancer Cell Apoptosis by Inducing Endoplasmic Reticulum and Mitochondrial Dysfunction. *Pharmaceutics*. **2020**;12(6):488. doi:10.3390/pharmaceutics12060488
- S44. Sajadimajid S, Yazdanparast R, Roshanzamir F. Augmentation of oxidative stress-induced apoptosis in MCF7 cells by ascorbate-tamoxifen and/or ascorbate-juglone treatments. *In Vitro Cell Dev Biol Anim*. **2016**;52(2):193-203. doi:10.1007/s11626-015-9961-4
- S45. Prasad S, Tyagi AK. Ginger and its constituents: role in prevention and treatment of gastrointestinal cancer. *Gastroenterol Res Pract*. **2015**;2015:142979. doi:10.1155/2015/142979
- S46. Parham S, Kharazi AZ, Bakhsheshi-Rad HR, Nur H, Ismail AF, Sharif S, RamaKrishna S, Berto F. Antioxidant, Antimicrobial and Antiviral Properties of Herbal Materials. *Antioxidants (Basel)*. **2020**. 21;9(12):1309. doi: 10.3390/antiox9121309.
- S47. Jiang X, Wang J, Chen P, et al. [6]-Paradol suppresses proliferation and metastases of pancreatic cancer by decreasing EGFR and inactivating PI3K/AKT signaling. *Cancer Cell Int*. **2021**;21(1):420. doi:10.1186/s12935-021-02118-0
- S48. Zhang, MM., Wang, D., Lu, F. *et al.* Identification of the active substances and mechanisms of ginger for the treatment of colon cancer based on network pharmacology and molecular docking. *BioData Mining*. **2021**. 14, 1. doi.org/10.1186/s13040-020-00232-9
- S49. Jeong JH, An JY, Kwon YT, Rhee JG, Lee YJ. Effects of low dose quercetin: cancer cell-specific inhibition of cell cycle progression. *J Cell Biochem*. **2009**;106(1):73-82. doi:10.1002/jcb.21977
- S50. Adams LS, Phung S, Yee N, Seeram NP, Li L, Chen S. Blueberry phytochemicals inhibit growth and metastatic potential of MDA-MB-231 breast cancer cells through modulation of the phosphatidylinositol 3-kinase pathway. *Cancer Res*. **2010**;70(9):3594-3605. doi:10.1158/0008-5472.CAN-09-3565
- S51. Kanaya N, Adams L, Takasaki A, Chen S. Whole blueberry powder inhibits metastasis of triple negative breast cancer in a xenograft mouse model through modulation of inflammatory cytokines. *Nutr Cancer*. **2014**;66(2):242-248. doi:10.1080/01635581.2014.863366
- S52. Thibado SP, Thornthwaite JT, Ballard TK, Goodman BT. Anticancer effects of Bilberry anthocyanins compared with NutraNanoSphere encapsulated Bilberry anthocyanins. *Mol Clin Oncol*. **2018**;8(2):330-335. doi:10.3892/mco.2017.1520
- S53. Adams LS, Phung S, Yee N, Seeram NP, Li L, Chen S. Blueberry phytochemicals inhibit growth and metastatic potential of MDA-MB-231 breast cancer cells through modulation of the phosphatidylinositol 3-kinase pathway. *Cancer Res*. **2010**;70(9):3594-3605. doi:10.1158/0008-5472.CAN-09-3565
- S54. Adams LS, Kanaya N, Phung S, Liu Z, Chen S. Whole blueberry powder modulates the growth and metastasis of MDA-MB-231 triple negative breast tumors in nude mice. *J Nutr*. **2011**;141(10):1805-1812. doi:10.3945/jn.111.140178
- S55. Li L, Adams LS, Chen S, Killian C, Ahmed A, Seeram NP. Eugenia jambolana Lam. berry extract inhibits growth and induces apoptosis of human breast cancer but not non-tumorigenic breast cells. *J Agric Food Chem*. **2009**;57(3):826-831. doi:10.1021/jf803407q
- S56. Sánchez C. Reactive oxygen species and antioxidant properties from mushrooms. *Synth Syst Biotechnol*. **2016**;2(1):13-22. Published 2016 Dec 24. doi:10.1016/j.synbio.2016.12.001
- S57. Oba K, Kobayashi M, Matsui T, Kodera Y, Sakamoto J. Individual patient based meta-analysis of lentinan for unresectable/recurrent gastric cancer. *Anticancer Res*. **2009**;29(7):2739-2745.
